# Supplementary material for: A p-tert-butylcalix[6]arene bearing phosphinoyl pendant arms for the complexation and sensitisation of lanthanide ions
Source: Royal Society of Chemistry journal article supplement (doi:10.1039/b206238k), 2002-01-01
Supplement: b206238k.doc [file b206238k.doc]

**A *p-tert*-butylcalix[6]arene bearing phosphinoyl pendant arms for the complexation and sensitisation of lanthanide ions**

#### **Flor de María Ramírez, *a,b* Sabi Varbanov,*a,c* Corine Cécile,*a* Gilles Muller,*a* Nicolas Fatin-Rouge,*a* Rosario Scopelliti*a* and Jean-Claude G. Bünzli**a***

*a* *Institute Molecular and Biological Chemistry, BCH, Swiss Federal Institute of Technology, CH-1015 Lausanne, Switzerland.* *E-mail:* [jean-claude.bunzli@epfl.ch](mailto:jean-claude.bunzli@icma.unil.ch)

*b* *Instituto Nacional de Investigaciones Nucleares, Departamento de Química, Km 36.5 Carretera México-Toluca, Salazar, Municipio de Ocoyoacac, C.P. 52045, Edo. de México, México*

*c Institute of Polymers, Bulgarian Academy of Sciences, BG-1113 Sofia, Bulgaria*

**Electronic Supporting Information**

**(6 pages)**

**
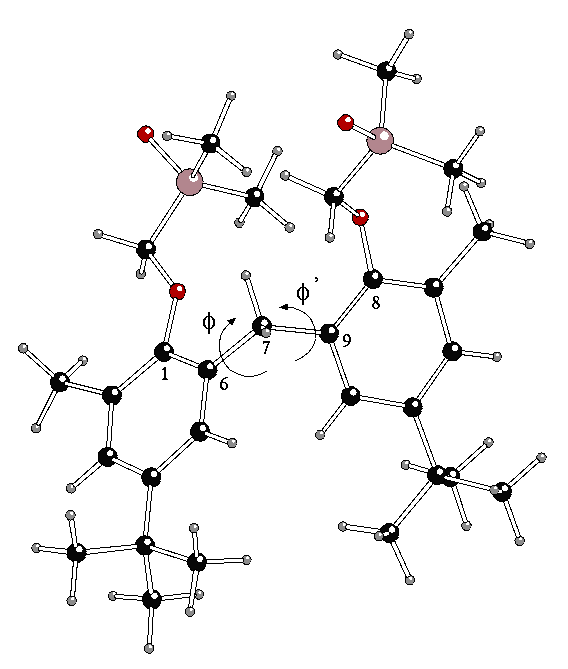
**

**Figure S1** Torsion angles of the methylene connecting moiety in the fragment containing two phenyl rings only.

**Figure S2** Absorption spectrum of the ligand and the 1:1 and 1:2 complexes with LaIII in acetonitrile

**Figure S3** 1H-NMR spectrum of the B6bL6 ligand and the isolated 1:1 and 1:2 La complexes in CD3CN at 298 K.

**-3**

**-2**

**-1**

**0**

**1**

**2**

**3**

**4**

**5**

**6**

**7**

**8**

**9**

**10**

**34**

**36**

**38**

**40**

**42**

**44**

**46**

**48**

**50**

**52**

**54**

**56**

**58**

**60**

**62**

**31P’NMR at 229 K**

**1H’NMR at 229 K**

**a)**

**** / ppm**

**Figure S4**. 1H-NMR (a) and 31P –NMR (b) spectra of La(B6bL6)(ClO4)3·3H2O, at 229 K in CD3CN.

**Figure S5.** High resolution luminescence spectra of powdered samples of the Eu(III) 1:1 (A) and Eu 1:2 (B) complexes with B6bL6 at 20 K.

**Figure S6** Emission spectra of the 1:1 and 1:2 Tb complex with B6bL6 at low temperature exciting through the ligand.
